# Supplementary material for: Anion–dipole interactions regulating the self-assembled nanostructures of polymers
Source: Royal Society of Chemistry journal article supplement (doi:10.1039/c5py00793c), 2015-01-01
Supplement: c5py00793c1.pdf [file c5py00793c1.pdf]

## Supplementary Information for

# Anion-dipole interactions regulating the self-assembled nanostructures of polymers

Long-Hai Wang, Wu Ting, Ye-Zi You

\*To whom correspondence should be addressed. E-mail: [zyyou@utsc.edu.cn](mailto:zyyou@utsc.edu.cn)

## 1. $^1\text{H-NMR}$ Measurements.<sup>1</sup>

Stock solutions of  $\text{PMEO}_3\text{MA}$  (2-(2-(2-methoxyethoxy)ethoxy)ethyl methacrylate, 10.0 mg/mL) and aqueous sodium salt solutions (2.0 M) were prepared using  $\text{D}_2\text{O}$  as solvent, respectively. All the testing samples have  $\text{PMEO}_3\text{MA}$  of 3.0 mg/mL, and sodium salt concentrations of 0.01 M to 1.0 M.  $^1\text{H-NMR}$  spectra for  $\text{PMEO}_3\text{MA}$  under different sodium salts concentration were obtained on a Bruker AV 400 (400 MHz) spectrometer equipped with Bruker BCU-05 temperature control unit.  $^1\text{H-NMR}$  spectra were recorded with NMR tubes adapted with coaxial inserts.  $\text{CDCl}_3$  containing 0.03% TMS was in the inner of the concentric capillary tube, while the mixed solution of  $\text{PMEO}_3\text{MA}$  and sodium salt was in the outer capillary tube. As such, the TMS control was never exposed to  $\text{PMEO}_3\text{MA}$  or varying salt concentrations.

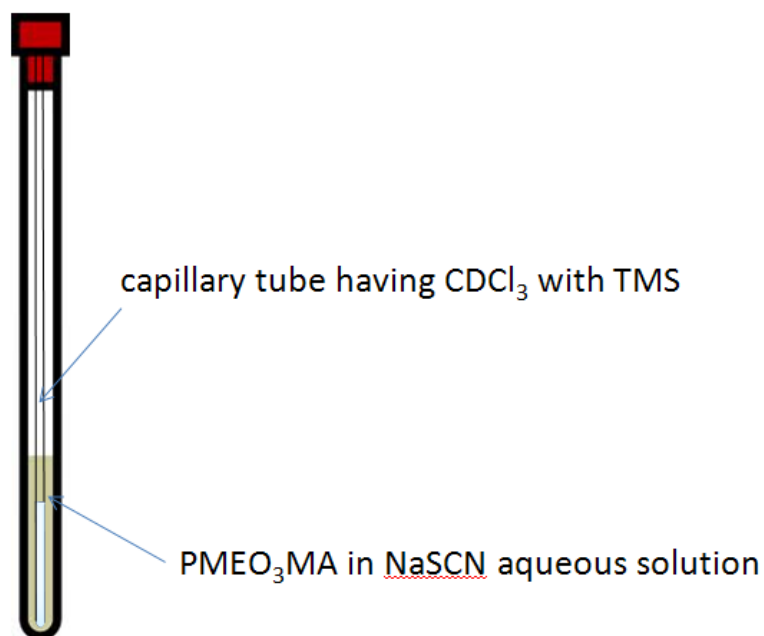

**Fig. S1** The illustration depicting  $^1\text{H-NMR}$  measurement: the mixed solution of  $\text{PMEO}_3\text{MA}$  and sodium salt was in the NMR tube, and  $\text{CDCl}_3$  containing 0.03% TMS was in the inner of the concentric capillary tube.

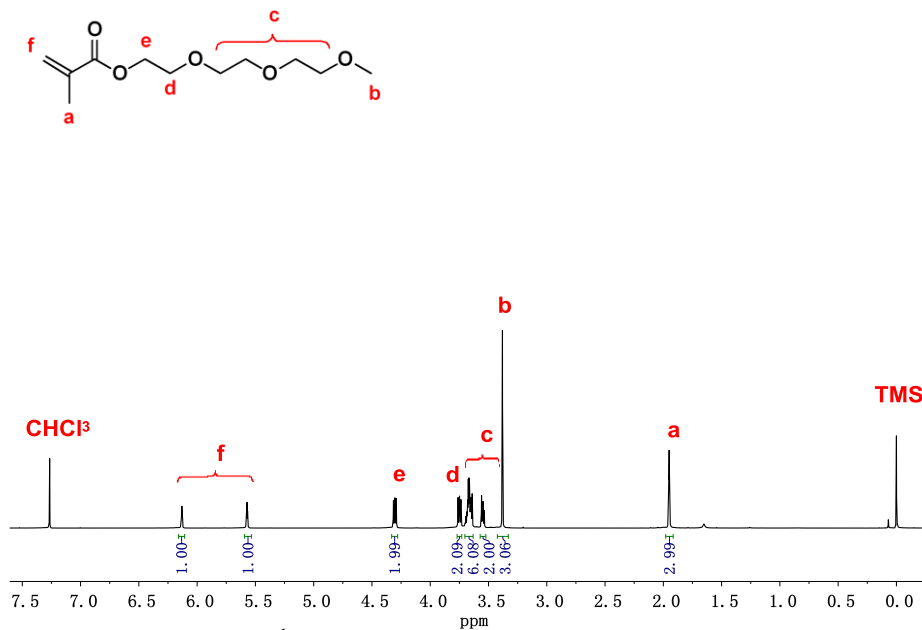

**Fig. S2** The <sup>1</sup>H-NMR spectrum of MEO<sub>3</sub>MA in CDCl<sub>3</sub>.

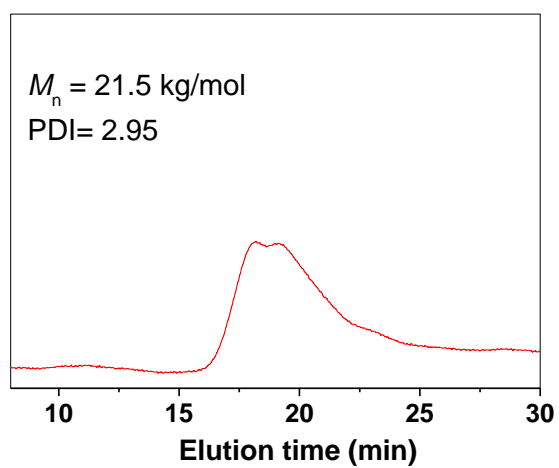

**Fig. S3** GPC curve of the PME<sub>03</sub>MA prepared via AIBN initiated traditional free radical polymerization.

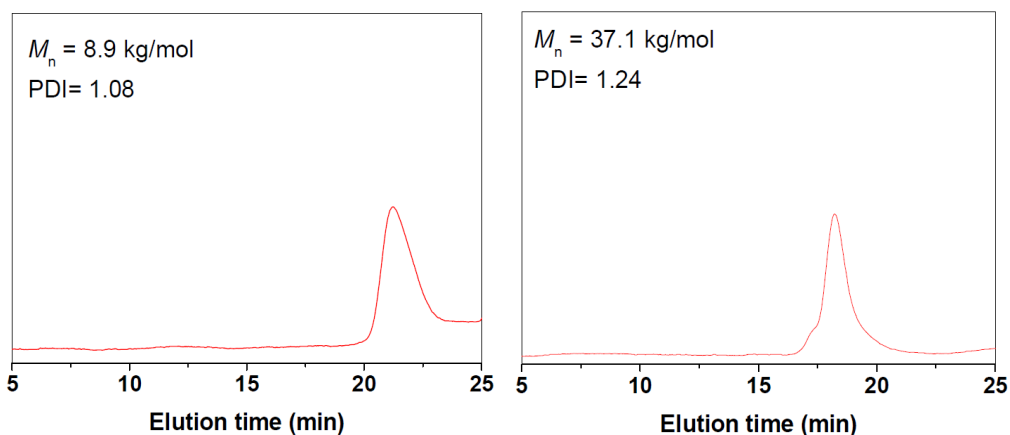

**Fig. S4** GPC curves of the homopolymer of PMEO<sub>3</sub>MAs with different molecular weights prepared from RAFT polymerization.

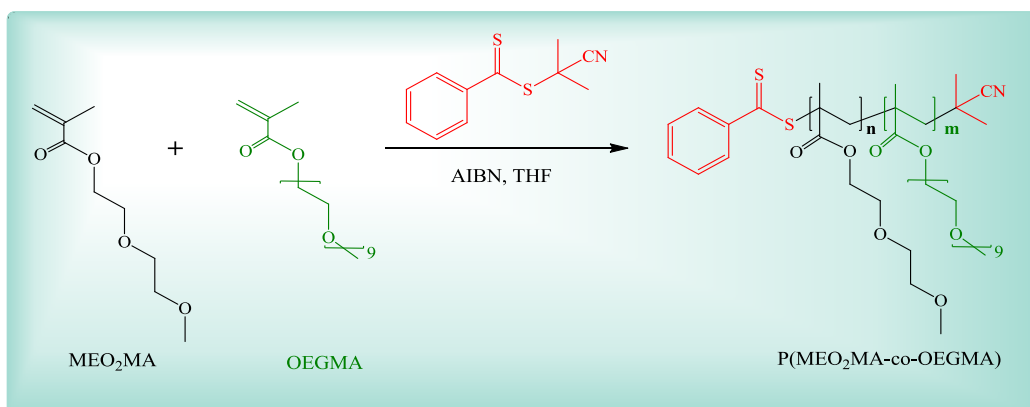

**Fig. S5** Synthesis of PEG-based copolymer P(MEO<sub>2</sub>MA-*co*-OEGMA) via RAFT polymerization.

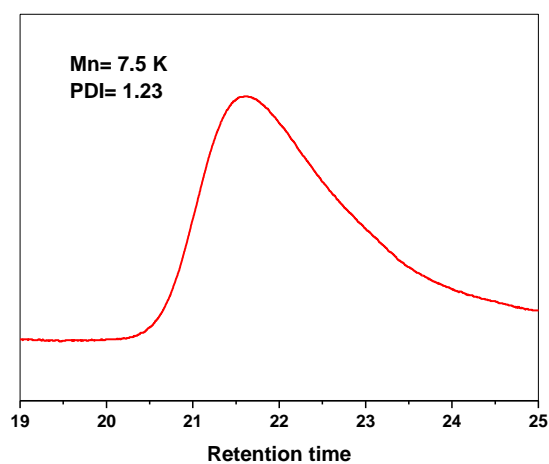

**Fig. S6** GPC curve of the copolymer P(MEO<sub>2</sub>MA-*co*-OEGMA) prepared from RAFT polymerization.

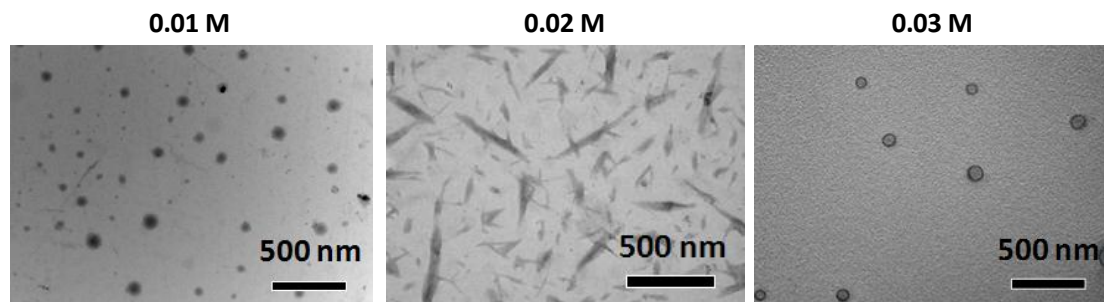

**Fig. S7** TEM images for the self-assembled nanostructures from copolymer P(MEO<sub>2</sub>MA-co-OEGMA) in NaSCN solution with different concentrations.

## 2. Calculation of $K_A$

Apparent equilibrium association constants ( $K_A$ ) of CH<sub>n</sub> unit with SCN<sup>-</sup> were abstracted from isotherm fitting of the <sup>1</sup>H-NMR data of PMEO<sub>3</sub>MA in the presence of NaSCN at 300 K and 323 K. To calculate association constants at other temperatures, Arrhenius equation was used:  $\ln(k_2/k_1) = -E_a(1/T_2 - 1/T_1)/R$ . First, the apparent activation energy ( $E_a$ ) for each binding site was obtained from Arrhenius equation using the known  $K_A$  at 300 K and 323 K, then association constants at other temperatures were obtained from Arrhenius equation using the  $E_a$ .

## 3. Calculation of amount of CH<sub>n</sub> units bound with SCN<sup>-</sup> based on the following equation.

$$\begin{aligned}
 \text{CH}_n + \text{SCN}^- &\xrightleftharpoons{K_A} \text{CH}_n \cdots \text{SCN}^- \\
 K_A(\text{average}) &= \frac{[\text{CH}_n \cdots \text{SCN}^-]}{[\text{CH}_n] \times [\text{SCN}^-]} \\
 &= \frac{[\text{CH}_n \cdots \text{SCN}^-]}{([\text{CH}_n]_0 - [\text{CH}_n \cdots \text{SCN}^-]) \times ([\text{SCN}^-]_0 - [\text{CH}_n \cdots \text{SCN}^-])}
 \end{aligned}$$

<sup>1</sup>H-NMR spectra of PMEO<sub>3</sub>MA with different NaSCN concentration were carried out in D<sub>2</sub>O. The CDCl<sub>3</sub> containing 0.03% TMS was in the inner of the concentric capillary tube, and the spectra were externally referenced to TMS.

**Table S1.** The  $K_A$  values for various  $CH_n$  units in  $PMEO_3MA$  at different temperatures.

|                      | 300 K         | 323 K         | 328 K         | 330 K         | 333 K         | 340 K         |
|----------------------|---------------|---------------|---------------|---------------|---------------|---------------|
| $CH_n$ position      | $K_A(M^{-1})$ | $K_A(M^{-1})$ | $K_A(M^{-1})$ | $K_A(M^{-1})$ | $K_A(M^{-1})$ | $K_A(M^{-1})$ |
| 1                    | 15.3          | 8.93          | 8.02          | 7.69          | 7.23          | 6.29          |
| 2                    | 8.1           | 4.55          | 4.05          | 3.87          | 3.62          | 3.12          |
| 3                    | 11.2          | 5.99          | 5.29          | 5.04          | 4.69          | 3.98          |
| 4                    | 10.5          | 4.97          | 4.28          | 4.04          | 3.71          | 3.05          |
| 5                    | 17.3          | 9.43          | 8.36          | 7.97          | 7.44          | 6.35          |
| average <sup>a</sup> | 12.1          | 6.55          | 5.80          | 5.53          | 5.15          | 4.39          |

The average association constant  $K_A(\text{average}) = (K_{A1} + K_{A2} + 3 * K_{A3} + K_{A4} + K_{A5}) / 7$ .

#### 4. Morphology control of the self-assembled nanostructures by using $SCN^-$ ion.

For regulating the morphology of the self-assembled nanostructures, different amount of  $NaSCN$  were added into  $PMEO_3MA$  solutions ( $PMEO_3MA$  concentration is 3.0 mg/mL), and these solutions were heated to the temperature above their LCSTs.

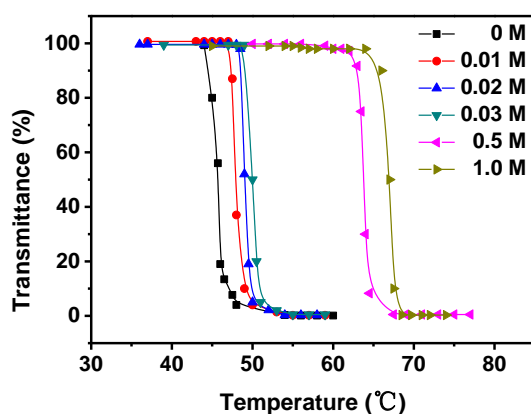

**Fig. S8** Transmittance change of the  $PMEO_3MA$  (3.0 mg/mL) in water at different concentration of  $NaSCN$  with temperature. The  $PMEO_3MA$  was prepared via AIBN initiated traditional free radical polymerization.

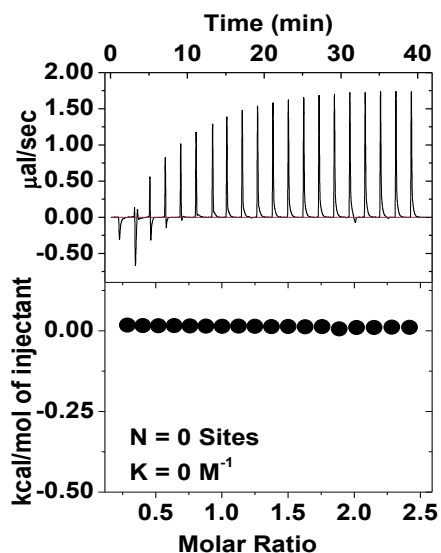

**Fig. S9** ITC titration curves showing that there is no interaction of the prepared PME<sub>3</sub>MA with Na<sub>2</sub>SO<sub>4</sub>. The PME<sub>3</sub>MA was prepared via AIBN initiated traditional free radical polymerization.

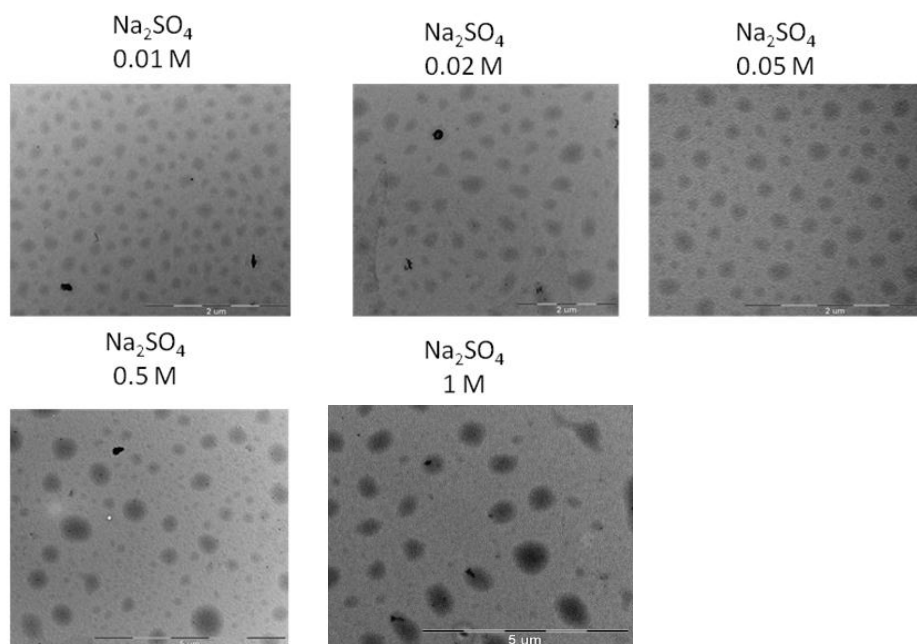

**Fig. S10** TEM images for the self-assembled nanostructures from the prepared PME<sub>3</sub>MA in Na<sub>2</sub>SO<sub>4</sub> aqueous solution with various concentrations. The PME<sub>3</sub>MA was prepared via AIBN initiated traditional free radical polymerization.

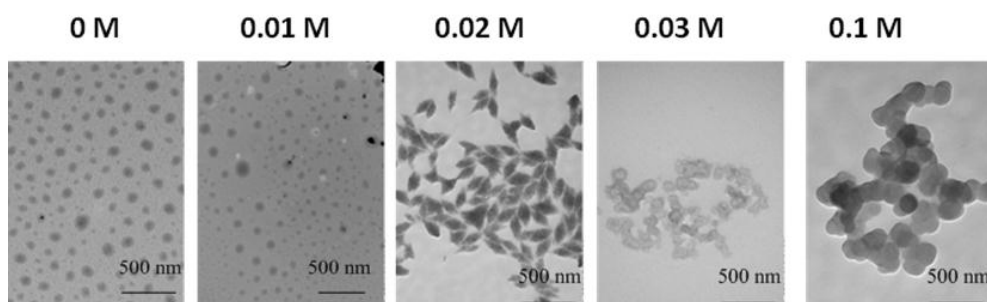

**Fig. S11** TEM images for the self-assembled nanostructures from the prepared neutral polar PME<sub>3</sub>MA in NH<sub>4</sub>SCN solution with different concentrations. The PME<sub>3</sub>MA was prepared via AIBN initiated traditional free radical polymerization.

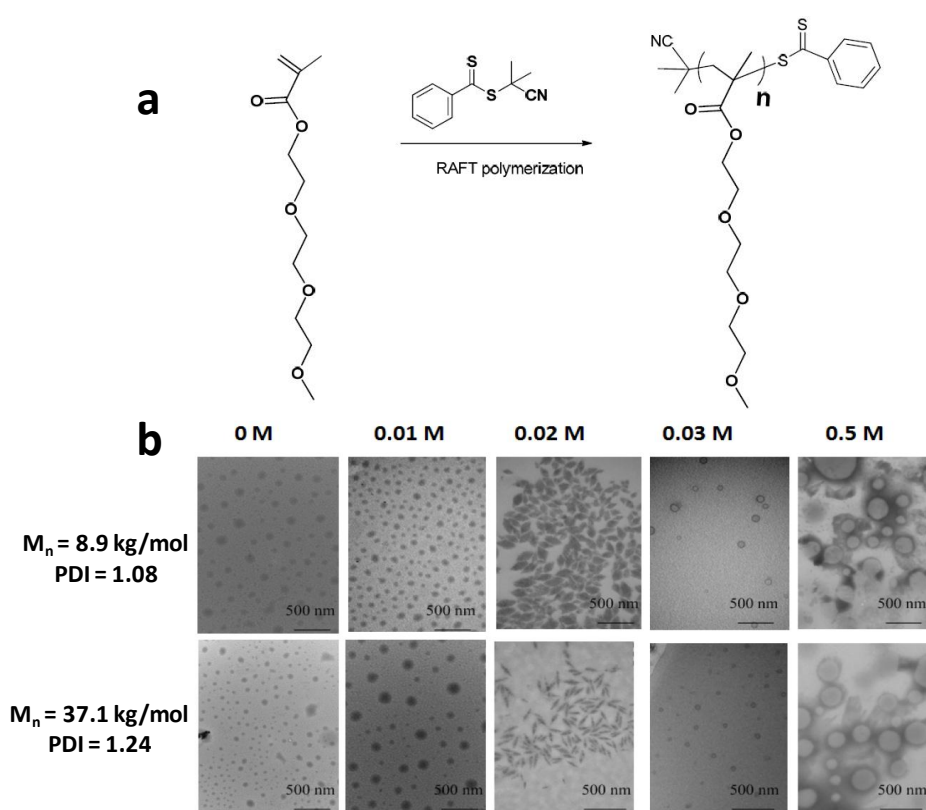

**Fig. S12** The effect of molecular weight of homopolymer on the self-assembly in NaSCN solution. a) Homopolymer PME<sub>3</sub>MA with different molecular weight prepared via RAFT polymerization. b) TEM images for the self-assembled nanostructures from the prepared homopolymer of PME<sub>3</sub>MA with molecular weight of 8.9 kg/mol and 37.1 kg/mol in NaSCN solution.

#### References:

1. K. B. Rembert, J. Paterová, J. Heyda, C. Hilty, P. Jungwirth, and P. S. Cremer, Molecular Mechanisms of Ion-Specific Effects on Proteins. *J. Am. Chem. Soc.* **134**, 10039.
